# Supplementary material for: Keeper-Animal Interactions: Differences between the Behaviour of Zoo Animals Affect Stockmanship
Source: PLoS One. 2015 Oct 28;10(10):e0140237. doi: 10.1371/journal.pone.0140237 (PMC4624973; doi:10.1371/journal.pone.0140237)
Supplement: S1 Table — Where MK = macaque keeper, RK = rhino keeper, ZK = zebra keeper, M = macaque (individual), R = rhino (individual), Z = zebra (individual). (XLSX) [file pone.0140237.s002.xlsx]

## Sheet: Latencies
Macaque					Rhino					Zebra
Keeper	animal	Cue	Mean lat		Keeper	animal	Cue	Mean lat		Keeper	animal	Cue	Mean lat
MK1	M1	1	11.4		RK1	R1	1	97		ZK1	Z1	1	8.46154
MK1	M2	1	10		RK1	R1	2	21.6		ZK1	Z1	2	30
MK1	M3	1	16.4		RK1	R1	3	1.6		ZK1	Z1	3	3.2963
MK1	M4	1	8.6		RK1	R2	1	43.4		ZK1	Z2	1	11.2308
MK2	M1	1	7.16667		RK1	R2	2	31.4		ZK1	Z2	2	36.9333
MK2	M2	1	5.6		RK1	R2	3	4.4		ZK1	Z2	3	4.55556
MK2	M3	1	7		RK2	R1	1	167.6		ZK2	Z1	1	14.2
MK2	M4	1	5		RK2	R1	2	60.3333		ZK2	Z1	2	19.6
MK3	M1	1	6.4		RK2	R1	3	2.6		ZK2	Z1	3	4.3
MK3	M2	1	5		RK2	R2	1	61		ZK2	Z2	1	26.8
MK3	M3	1	7.2		RK2	R2	2	24.2		ZK2	Z2	2	24
MK3	M4	1	5		RK2	R2	3	5		ZK2	Z2	3	4.8
MK4	M5	1	7.42857		RK3	R1	1	216.6		ZK3	Z3	1	9.875
MK4	M6	1	7		RK3	R1	2	12.4		ZK3	Z3	2	13.25
MK4	M7	1	8.57143		RK3	R1	3	1.6		ZK3	Z3	3	2.25
MK4	M8	1	7.14286		RK3	R2	1	79.2		ZK3	Z4	1	11.375
MK5	M5	1	18.75		RK3	R2	2	28.8		ZK3	Z4	2	15.5
MK5	M6	1	19.75		RK3	R2	3	5.2		ZK3	Z4	3	3.125
MK5	M7	1	15.75		RK4	R3	1	109.6		ZK3	Z5	1	10.125
MK5	M8	1	16.75		RK4	R3	2	10.6		ZK3	Z5	2	16.5
MK6	M10	1	29.6		RK4	R3	3	4		ZK3	Z5	3	4
MK6	M11	1	30.8		RK4	R4	1	60		ZK3	Z6	1	13.5
MK6	M12	1	26		RK4	R4	2	41		ZK3	Z6	2	14.625
MK6	M9	1	16.8		RK4	R4	3	2		ZK3	Z6	3	4.875
MK7	M10	1	14.5		RK4	R5	1	48.8		ZK4	Z3	1	27.875
MK7	M11	1	18.75		RK4	R5	2	63.2		ZK4	Z3	2	51.125
MK7	M12	1	15.75		RK4	R5	3	2.4		ZK4	Z3	3	3.25
MK7	M9	1	7.5		RK4	R6	1	2.4		ZK4	Z4	1	28.125
MK8	M10	1	52.4		RK4	R6	2	57.4		ZK4	Z4	2	54
MK8	M11	1	53		RK4	R6	3	1.8		ZK4	Z4	3	3.25
MK8	M12	1	32.6		RK5	R3	1	51.4		ZK4	Z5	1	30.375
MK8	M9	1	42.2		RK5	R3	2	62.4		ZK4	Z5	2	58.5
MK1	M1	2	27.2857		RK5	R3	3	2.4		ZK4	Z5	3	3
MK1	M2	2	23.7143		RK5	R4	1	161.8		ZK4	Z6	1	25.125
MK1	M3	2	36.75		RK5	R4	2	20.6		ZK4	Z6	2	55.875
MK1	M4	2	27		RK5	R4	3	2.4		ZK4	Z6	3	3
MK2	M1	2	8.6		RK5	R5	1	58.8		ZK5	Z10	1	27.5
MK2	M2	2	4.6		RK5	R5	2	40.2		ZK5	Z10	2	21.6667
MK2	M3	2	17.4		RK5	R5	3	1.8		ZK5	Z10	3	2
MK2	M4	2	6.2		RK5	R6	1	74.2		ZK5	Z11	1	30
MK3	M1	2	7.6		RK5	R6	2	37.4		ZK5	Z11	2	16
MK3	M2	2	6		RK5	R6	3	2		ZK5	Z11	3	1.83333
MK3	M3	2	9.2		RK6	R7	1	7.4		ZK5	Z3	1	25.5714
MK3	M4	2	6.6		RK6	R7	2	4.8		ZK5	Z3	2	43.8571
MK4	M5	2	4.8		RK6	R7	3	1.2		ZK5	Z3	3	3.57143
MK4	M6	2	9		RK6	R8	1	4.6		ZK5	Z4	1	22.8571
MK4	M7	2	10.2		RK6	R8	2	8.2		ZK5	Z4	2	43.5714
MK4	M8	2	28.6		RK6	R8	3	1.4		ZK5	Z4	3	4
MK5	M5	2	39.7		RK7	R7	1	22.6		ZK5	Z5	1	24.5714
MK5	M6	2	37.7		RK7	R7	2	18		ZK5	Z5	2	40.8571
MK5	M7	2	36.2		RK7	R7	3	1.2		ZK5	Z5	3	2.85714
MK5	M8	2	46.7		RK7	R8	1	21.4		ZK5	Z6	1	25.8571
MK6	M10	2	18.875		RK7	R8	2	20.6		ZK5	Z6	2	38.5714
MK6	M11	2	13.5		RK7	R8	3	1.4		ZK5	Z6	3	4
MK6	M12	2	15.625							ZK5	Z7	1	41.5
MK6	M9	2	11							ZK5	Z7	2	29.3333
MK7	M10	2	21.6667							ZK5	Z7	3	1.16667
MK7	M11	2	12.3333							ZK5	Z8	1	30.3333
MK7	M12	2	16.1667							ZK5	Z8	2	15.5
MK7	M9	2	6.83333							ZK5	Z8	3	2.83333
MK8	M10	2	25.7							ZK5	Z9	1	23.3333
MK8	M11	2	26.5							ZK5	Z9	2	18.3333
MK8	M12	2	22							ZK5	Z9	3	2.16667
MK8	M9	2	15.6							ZK6	Z10	1	19.4
MK1	M1	3	6.6							ZK6	Z10	2	12.6
MK1	M2	3	12							ZK6	Z10	3	2
MK1	M3	3	11.4							ZK6	Z11	1	13.6
MK1	M4	3	4.2							ZK6	Z11	2	9.8
MK2	M1	3	4.8							ZK6	Z11	3	1.2
MK2	M2	3	3.6							ZK6	Z7	1	21.6
MK2	M3	3	7							ZK6	Z7	2	19.6
MK2	M4	3	4.2							ZK6	Z7	3	1
MK3	M1	3	3.83333							ZK6	Z8	1	14.2
MK3	M2	3	4.33333							ZK6	Z8	2	10.8
MK3	M3	3	6.16667							ZK6	Z8	3	2.2
MK3	M4	3	3.16667							ZK6	Z9	1	15.2
MK4	M5	3	2.69231							ZK6	Z9	2	10.6
MK4	M6	3	4							ZK6	Z9	3	2.4
MK4	M7	3	4.30769							ZK7	Z10	1	60.75
MK4	M8	3	5.69231							ZK7	Z10	2	55.25
MK5	M5	3	3.83333							ZK7	Z10	3	3.5
MK5	M6	3	3.58333							ZK7	Z11	1	58.75
MK5	M7	3	4.66667							ZK7	Z11	2	46.75
MK5	M8	3	3.83333							ZK7	Z11	3	4
MK6	M10	3	2.16667							ZK7	Z7	1	77.25
MK6	M11	3	2							ZK7	Z7	2	71
MK6	M12	3	3							ZK7	Z7	3	2
MK6	M9	3	1.33333							ZK7	Z8	1	67.25
MK7	M10	3	2.33333							ZK7	Z8	2	55
MK7	M11	3	2.66667							ZK7	Z8	3	4
MK7	M12	3	2.66667							ZK7	Z9	1	64.75
MK7	M9	3	2							ZK7	Z9	2	50.25
MK8	M10	3	3.7							ZK7	Z9	3	3
MK8	M11	3	2.3
MK8	M12	3	2.9
MK8	M9	3	1.8
